# Supplementary material for: Chemical and Enzymatic Synthesis of Biobased Xylo-Oligosaccharides and Fermentable Sugars from Wheat Straw for Food Applications
Source: MDPI journal article supplement (doi:10.3390/polym14071336), 2022-03-25
Supplement: s1 [file s1]

Supplementary File S1. State of the art regarding wheat straw fractioning after various treatments in terms of monosaccharides, xylo-oligosaccharides and inhibitors yields

| Reference                     | Treatment Conditions                                                                                                                                                                                             | Samples <sup>3</sup>      | Monosaccharides |                  |                     | Xylo-oligosaccharides (XOS) |                   |                     |                                     |                  | Inhibitors         |                 |            |
|-------------------------------|------------------------------------------------------------------------------------------------------------------------------------------------------------------------------------------------------------------|---------------------------|-----------------|------------------|---------------------|-----------------------------|-------------------|---------------------|-------------------------------------|------------------|--------------------|-----------------|------------|
|                               |                                                                                                                                                                                                                  |                           | Glucose (g/kg)  | Xylose (g/kg)    | Total Sugars (g/kg) | Xylobiose (X2) (g/kg)       | Xylotriose (g/kg) | Xylotetraose (g/kg) | Other XOS (DP 4–6 or DP > 6) (g/kg) | Total XOS (g/kg) | Acetic Acid (g/kg) | Furfural (g/kg) | HMF (g/kg) |
| Chen et al., 2018 [10]        | HTP <sup>1</sup> (120, 140, 160, 180 and 200 °C, 30 min); Alkaline ethanol treatment (NaOH), enzymatic hydrolysis (CellicTec2), 50 °C, 72 h                                                                      | L <sub>140</sub>          | NA <sup>8</sup> | 0.06             |                     | 0.11                        | 0.07              | 0.05                | 4.59                                | 4.82             | 10.9               | ND              | ND         |
|                               |                                                                                                                                                                                                                  | L <sub>160</sub>          | NA              | 0.21             |                     | 0.58                        | 0.59              | 0.30                | 30.15                               | 31.62            | 13.99              | ND              | ND         |
|                               |                                                                                                                                                                                                                  | L <sub>180</sub>          | NA              | 6.04             |                     | 5.37                        | 4.25              | 2.27                | 49.8                                | 61.69            |                    |                 |            |
| Huang et al., 2017 [18]       | LHWP <sup>2</sup> (140–220 °C, 20–80 min)                                                                                                                                                                        | L <sub>140</sub> (40 min) | ND <sup>9</sup> | 10± 0.0          |                     |                             |                   | 5 ± 0.1             |                                     |                  | 0.6 ± 0.2          | 0.0 ± 0.0       |            |
|                               |                                                                                                                                                                                                                  | L <sub>160</sub> (40 min) | 1 ± 0.0         | 2 ± 0.0          |                     |                             |                   | 20 ± 0.2            |                                     |                  | 0.8 ± 0.1          | 0.0 ± 0.0       |            |
|                               |                                                                                                                                                                                                                  | L <sub>180</sub> (20 min) | 3 ± 0.2         | 2 ± 0.0          |                     |                             |                   | 42 ± 0.5            |                                     |                  | 0.8 ± 0.0          | 0.1 ± 0.0       |            |
|                               |                                                                                                                                                                                                                  | L <sub>180</sub> (40 min) | 3 ± 0.1         | 6 ± 0.2          |                     |                             |                   | 49 ± 0.2            |                                     |                  | 1.0 ± 0.1          | 0.1 ± 0.0       |            |
|                               |                                                                                                                                                                                                                  | L <sub>180</sub> (60 min) | 2 ± 0.1         | 4 ± 0.1          |                     |                             |                   | 48 ± 0.4            |                                     |                  | 1.0 ± 0.3          | 0.2 ± 0.1       |            |
|                               |                                                                                                                                                                                                                  | L <sub>180</sub> (80 min) | 2 ± 0.0         | 5 ± 0.0          |                     |                             |                   | 36 ± 0.1            |                                     |                  | 1.1 ± 0.3          | 0.2 ± 0.0       |            |
|                               | Enzymatic hydrolysis ((Cellic CTec2 (25 FPU/g-cellulose), 50 °C, 150 rpm 48 h))                                                                                                                                  | L <sub>140</sub> (40 min) | 65 ± 0.1        | 32 ± 0.2         |                     |                             |                   |                     |                                     |                  |                    |                 |            |
|                               |                                                                                                                                                                                                                  | L <sub>160</sub> (40 min) | 70 ± 0.0        | 41 ± 0.9         |                     |                             |                   |                     |                                     |                  |                    |                 |            |
|                               |                                                                                                                                                                                                                  | L <sub>180</sub> (20 min) | 90 ± 0.4        | 42 ± 0.2         |                     |                             |                   |                     |                                     |                  |                    |                 |            |
|                               |                                                                                                                                                                                                                  | L <sub>180</sub> (40 min) | 117 ± 0.7       | 41 ± 0.5         |                     |                             |                   |                     |                                     |                  |                    |                 |            |
|                               |                                                                                                                                                                                                                  | L <sub>180</sub> (20 min) | 90 ± 0.4        | 42 ± 0.2         |                     | 1.5 ± 0.1                   | 1.4 ± 0.1         | 1.7 ± 0.6           | 0.17 ± 0.0                          | 9.2 ± 0.2        |                    |                 |            |
|                               |                                                                                                                                                                                                                  | L <sub>180</sub> (60 min) | 116 ± 0.7       | 31 ± 0.3         |                     |                             |                   |                     |                                     |                  |                    |                 |            |
| Ertas et al., 2014 [15]       | HTP (160–200 °C for 10–20 min)+acid hydrolysis ((4% (w/w) H <sub>2</sub> SO <sub>4</sub> for 1 h at 121 °C)                                                                                                      | L <sub>160</sub> (10 min) | 1.3             | 1.5 <sup>4</sup> | 2.8                 |                             |                   |                     |                                     |                  |                    |                 |            |
|                               |                                                                                                                                                                                                                  | L <sub>160</sub> (20 min) | 1.8             | 2.2              | 4.0                 |                             |                   |                     |                                     |                  |                    |                 |            |
|                               |                                                                                                                                                                                                                  | L <sub>180</sub> (10 min) | 2.9             | 6.8              | 9.7                 |                             |                   |                     |                                     |                  |                    |                 |            |
|                               |                                                                                                                                                                                                                  | L <sub>180</sub> (20 min) | 2.3             | 8.5              | 10.8                |                             |                   |                     |                                     |                  |                    |                 |            |
|                               |                                                                                                                                                                                                                  | L <sub>190</sub> (10 min) | 2.9             | 9.3              | 12.2                |                             |                   |                     |                                     |                  |                    |                 |            |
|                               |                                                                                                                                                                                                                  | L <sub>190</sub> (20 min) | 2.7             | 7.4              | 10.1                |                             |                   |                     |                                     |                  |                    |                 |            |
| Antov and Dordevic, 2017 [17] | US <sup>5</sup> +enzymatic hydrolysis (endo-xylanase, 0.15 U/g or 0.30 U/g, 48h                                                                                                                                  | L1 <sup>6</sup>           | 30.9            | 7.9              |                     |                             |                   | 85.1                |                                     |                  |                    |                 |            |
|                               |                                                                                                                                                                                                                  | L2 <sup>7</sup>           | 37.4            | 14.2             |                     |                             |                   | 83.8                |                                     |                  |                    |                 |            |
| Ilanidis et al., 2021 [56]    | HTP (160, 175, 190, and 205 °C, 15 min)                                                                                                                                                                          | L <sub>160</sub>          | 0.1 ± 0.1       | 0.1 ± 0.1        |                     |                             |                   | NA                  |                                     |                  | 15 ± 0.1           | <0.1 ± 0.1      | <0.1 ± 0.1 |
|                               |                                                                                                                                                                                                                  | L <sub>175</sub>          | 0.1 ± 0.1       | 0.1 ± 0.1        |                     |                             |                   | NA                  |                                     |                  | 22.5 ± 0.1         | <0.1 ± 0.1      | <0.1 ± 0.1 |
|                               |                                                                                                                                                                                                                  | L <sub>190</sub>          | 0.1 ± 0.1       | 1.6 ± 0.1        |                     |                             |                   | NA                  |                                     |                  | 36.1 ± 0.1         | <0.1 ± 0.1      | <0.1 ± 0.1 |
|                               |                                                                                                                                                                                                                  | L <sub>205</sub>          | 0.7 ± 0.1       | 4.4 ± 0.1        |                     |                             |                   |                     |                                     |                  |                    |                 |            |
|                               |                                                                                                                                                                                                                  |                           |                 |                  |                     |                             |                   |                     |                                     |                  |                    |                 |            |
|                               | aqueous sulfuric acid (160, 190°C, 15 min)                                                                                                                                                                       | L <sub>160</sub>          | 0.2 ± 0.1       | 0.1 ± 0.1        |                     |                             |                   | NA                  |                                     |                  | 11.7 ± 0.1         | <0.1 ± 0.1      | <0.1 ± 0.1 |
|                               |                                                                                                                                                                                                                  | L <sub>190</sub>          | 0.2 ± 0.1       | 2.5 ± 0.1        |                     |                             |                   | NA                  |                                     |                  | 33.8 ± 0.1         | <0.1 ± 0.1      | <0.1 ± 0.1 |
| Akpınar et al., 2009 [59]     | Alkaline treatment (xylan extraction) Enzymatic hydrolysis (4U/mL of xylanase from <i>A. niger</i> , pH 5.5 40 °C, 24h or 4U/mL of xylanase from <i>T. longibrachiatum</i> , pH 4.6 at 50 °C, 24h) <sup>10</sup> |                           | 3.15 ± 0.07     | 79.9 ± 0.2       |                     | 0.786 ± 0.079               | 0.719 ± 0.072     | 0.0767 ± 0.008      | 0.551                               | 0.719            |                    |                 |            |
|                               |                                                                                                                                                                                                                  |                           |                 |                  |                     |                             |                   |                     |                                     |                  |                    |                 |            |
| Carvalho et al., 2009 [43]    | Autohydrolysis (150 °C–240 °C, non-isothermal conditions)                                                                                                                                                        | L <sub>150</sub>          | 0.63            | 1.66             |                     |                             |                   |                     |                                     |                  | 0.64               | ND              | 0.01       |
|                               |                                                                                                                                                                                                                  | L <sub>170</sub>          | 0.97            | 1.79             |                     |                             |                   |                     |                                     |                  | 0.80               | ND              | 0.01       |
|                               |                                                                                                                                                                                                                  | L <sub>190</sub>          | 0.73            | 1.44             |                     |                             |                   |                     |                                     |                  | 1.31               | 0.01            | 0.01       |
|                               |                                                                                                                                                                                                                  | L <sub>200</sub>          | 1.63            | 0.84             |                     |                             |                   |                     |                                     |                  | 1.70               | 0.03            | 0.01       |
| Nabarlatz et al., 2007 [20]   | Autohydrolysis (179 °C, 23 min) <sup>11</sup>                                                                                                                                                                    |                           | 0.8             | 0.9              |                     |                             |                   |                     |                                     | 41.2             | 0.6                | 0.0             | 0.2        |
